# Supplementary material
Source: PubMed Central journal article supplement (PMC7286362)
Supplement: NIHMS1595250-supplement-SupportingInfo1.pdf [file NIHMS1595250-supplement-SupportingInfo1.pdf]

## Supporting Information

### Discovery of a First-in-class Protein Arginine Methyltransferase 6 (PRMT6) Covalent Inhibitor

Yudao Shen,<sup>†,#</sup> Fengling Li,<sup>§,#</sup> Magdalena M. Szewczyk,<sup>§,#</sup> Levon Halabelian,<sup>§</sup> Kwang-su Park,<sup>†</sup> Irene Chau,<sup>§</sup> Aiping Dong,<sup>§</sup> Hong Zeng,<sup>§</sup> He Chen,<sup>†</sup> Fanye Meng,<sup>†</sup> Dalia Barsyte-Lovejoy,<sup>§</sup> Cheryl H. Arrowsmith,<sup>§,‡</sup> Peter J. Brown,<sup>§</sup> Jing Liu,<sup>†,\*</sup> Masoud Vedadi,<sup>§,£,\*</sup> and Jian Jin<sup>†,\*</sup>

<sup>†</sup>Mount Sinai Center for Therapeutics Discovery, Departments of Pharmacological Sciences and Oncological Sciences, Tisch Cancer Institute, Icahn School of Medicine at Mount Sinai, New York, NY 10029, United States

<sup>§</sup>Structural Genomics Consortium, University of Toronto, Toronto, ON M5G 1L7, Canada

<sup>£</sup>Department of Pharmacology and Toxicology, University of Toronto, Toronto, Ontario M5S 1A8, Canada

<sup>‡</sup>Princess Margaret Cancer Centre and Department of Medical Biophysics, University of Toronto, Toronto, Ontario M5G 2M9, Canada

### Table of Contents

|                                                                                               |    |
|-----------------------------------------------------------------------------------------------|----|
| <b>Table S1.</b> Crystallography data and refinement statistics                               | S3 |
| <b>Table S2.</b> Selectivity of compound <b>4</b> against 33 methyltransferases               | S4 |
| <b>Supplementary Figure S1.</b> Sequence alignment of type I PRMTs                            | S6 |
| <b>Supplementary Figure S2.</b> MS assay results for PRMT1 incubated with compound <b>4</b>   | S7 |
| <b>Supplementary Figure S3.</b> MS assay results for PRMT3 incubated with compound <b>4</b>   | S7 |
| <b>Supplementary Figure S4.</b> Mass assay results for PRMT4 incubated with compound <b>4</b> | S8 |

|                                                                                             |     |
|---------------------------------------------------------------------------------------------|-----|
| <b>Supplementary Figure S5.</b> MS assay results for PRMT8 incubated with compound <b>4</b> | S8  |
| <b>Supplementary Figure S6.</b> <sup>1</sup> HNMR spectrum of compound <b>1</b>             | S9  |
| <b>Supplementary Figure S7.</b> <sup>13</sup> CNMR spectrum of compound <b>1</b>            | S10 |
| <b>Supplementary Figure S8.</b> <sup>1</sup> HNMR spectrum of compound <b>2</b>             | S11 |
| <b>Supplementary Figure S9.</b> <sup>13</sup> CNMR spectrum of compound <b>2</b>            | S12 |
| <b>Supplementary Figure S10.</b> <sup>1</sup> HNMR spectrum of compound <b>3</b>            | S13 |
| <b>Supplementary Figure S11.</b> <sup>13</sup> CNMR spectrum of compound <b>3</b>           | S14 |
| <b>Supplementary Figure S12.</b> <sup>1</sup> HNMR spectrum of compound <b>4</b>            | S15 |
| <b>Supplementary Figure S13.</b> <sup>13</sup> CNMR spectrum of compound <b>4</b>           | S16 |
| <b>Supplementary Figure S14.</b> HPLC-HRMS spectrum of compound <b>4</b>                    | S17 |
| <b>Supplementary Figure S15.</b> <sup>1</sup> HNMR spectrum of compound <b>5</b>            | S18 |
| <b>Supplementary Figure S16.</b> <sup>13</sup> CNMR spectrum of compound <b>5</b>           | S19 |
| <b>Supplementary Figure S17.</b> HPLC-HRMS spectrum of compound <b>5</b>                    | S20 |
| <b>Supplementary Figure S18.</b> <sup>1</sup> HNMR spectrum of compound <b>6</b>            | S21 |
| <b>Supplementary Figure S19.</b> <sup>13</sup> CNMR spectrum of compound <b>6</b>           | S22 |
| <b>Supplementary Figure S20.</b> <sup>1</sup> HNMR spectrum of compound <b>7</b>            | S23 |
| <b>Supplementary Figure S21.</b> <sup>13</sup> CNMR spectrum of compound <b>7</b>           | S24 |
| <b>Supplementary Figure S22.</b> HPLC-HRMS spectrum of compound <b>7</b>                    | S25 |

**Table S1.** Crystallography Data collection and refinement statistics of PRMT6-compound 4 (MS117) complex

|                                        | PRMT6_MS117<br>(PDB 6P7I) |
|----------------------------------------|---------------------------|
| <b>Data collection</b>                 |                           |
| Space group                            | $P 2_1$                   |
| Cell dimensions                        |                           |
| <i>a</i> , <i>b</i> , <i>c</i> (Å)     | 78.09, 135.13, 83.21      |
| $\alpha$ , $\beta$ , $\gamma$ (°)      | 90.00, 98.01, 90.00       |
| Resolution (Å)                         | 50.0-2.00 (2.03-2.00)*    |
| $R_{\text{sym}}$ or $R_{\text{merge}}$ | 0.093 (0.927)             |
| $I / \sigma I$                         | 26.6 (1.7)                |
| Completeness (%)                       | 99.9 (98.0)               |
| Redundancy                             | 7.0 (5.9)                 |
| <b>Refinement</b>                      |                           |
| Resolution (Å)                         | 50.00-2.00                |
| No. reflections                        | 111464                    |
| $R_{\text{work}} / R_{\text{free}}$    | 0.184/0.222               |
| No. atoms                              |                           |
| Protein                                | 10666                     |
| Inhibitor MS117                        | 106                       |
| SAH                                    | 104                       |
| Water                                  | 767                       |
| <i>B</i> -factors                      |                           |
| Protein                                | 36.0                      |
| Inhibitor MS117                        | 33.7                      |
| SAH                                    | 27.2                      |
| Water                                  | 41.6                      |
| R.m.s. deviations                      |                           |
| Bond lengths (Å)                       | 0.010                     |
| Bond angles (°)                        | 1.422                     |

\*Values in parentheses are for highest-resolution shell.

**Table S2.** Selectivity of compound **4** against 33 methyltransferases

| Mtases    | MS117 (Activity %) |            |
|-----------|--------------------|------------|
|           | 10 $\mu$ M         | 50 $\mu$ M |
| PRMT6     | 2                  | 1          |
| PRMT1     | 3                  | 2          |
| PRMT3     | 7                  | 2          |
| PRMT4     | 9                  | 2          |
| PRMT5     | 102                | 69         |
| PRMT7     | 95                 | 12         |
| PRMT8     | 4                  | 2          |
| PRMT9     | 108                | 90         |
| G9a       | 94                 | 85         |
| GLP       | 88                 | 80         |
| SUV39H1   | 81                 | 5          |
| SUV39H2   | 87                 | 59         |
| SETDB1    | 108                | 93         |
| PRDM9     | 91                 | 71         |
| SETD7     | 89                 | 10         |
| SETD8     | 101                | 101        |
| MLL1      | 96                 | 92         |
| MLL3      | 100                | 100        |
| SUV420H1  | 107                | 77         |
| SUV420H2  | 100                | 77         |
| PRC2      | 85                 | 52         |
| SETD2     | 93                 | 81         |
| SMYD2     | 92                 | 90         |
| SMYD3     | 101                | 96         |
| BCDIN3D   | 100                | 100        |
| DNMT1     | 94                 | 94         |
| DNMT3A/3L | 65                 | 30         |
| DNMT3B/3L | 105                | 53         |
| NSD1      | 109                | 105        |
| NSD2      | 116                | 117        |
| NSD3      | 122                | 120        |
| Ash1L     | 103                | 99         |
| DOT1L     | 95                 | 103        |

CLUSTAL 0(1.2.4) multiple sequence alignment

```

SP|096L8|PRMT6_HUMAN -----
SP|099873|PRMT1_HUMAN -----
SP|P55345|PRMT2_HUMAN -----M-ATS----- 4
SP|060678|PRMT3_HUMAN MC-----SLASGATGGRGAVENEE-DLPELSDSGDEAAWEDED-----DADL 41
SP|086X55|CARM1_HUMAN MAAAAAAGVPGAG--GAGSA---VP--GGA----- 23
SP|014744|PRMT5_HUMAN MA---AMAVGGAGGSRVSSGRDLCVPEIADTLGAVAKQGFDFLCHPVFHPFRKRFIEQ 57
SP|09NV4|PRMT7_HUMAN -----
SP|09NR22|PRMT8_HUMAN -----
SP|06P2P2|PRMT9_HUMAN MSNSRPRSRRDAGGGAAGRDE-LVSRSL----- 29

SP|096L8|PRMT6_HUMAN -----
SP|099873|PRMT1_HUMAN -----
SP|P55345|PRMT2_HUMAN -----GDCPRSE-----SQGEEPAECSEAG--LLOEG---VQ 31
SP|060678|PRMT3_HUMAN PHGKQOTPLFCN---RLFT-----SAEETFSHCKSEHFNIDSMVHKH 82
SP|086X55|CARM1_HUMAN ---GPCATVSVFPGARLLT---IG-----DANGEIORHAEQQA-LRLEV---RA 62
SP|014744|PRMT5_HUMAN PAKNRPGPOTRSDLLLSGRDWNLTIVGKLSPIRPSKVEKIRNSEEAM-M-----LQ 109
SP|09NV4|PRMT7_HUMAN -----
SP|09NR22|PRMT8_HUMAN -----
SP|06P2P2|PRMT9_HUMAN -----QSAEHCLGVQ-----DF 41

SP|096L8|PRMT6_HUMAN -----
SP|099873|PRMT1_HUMAN -----
SP|P55345|PRMT2_HUMAN PEEFVAI----- 38
SP|060678|PRMT3_HUMAN GLEFYGYIKLINFIR-LKNPTVEY-----MNSIYNVPWKEEYL-KPVLEDDL 131
SP|086X55|CARM1_HUMAN GPDSAGI----- 69
SP|014744|PRMT5_HUMAN ELNFGAYLGLPAFLPLLNQEDNTLNARLVNHIHTGHSSMFMWRVPLVAPEDLRDDIE 169
SP|09NV4|PRMT7_HUMAN -----
SP|09NR22|PRMT8_HUMAN -----
SP|06P2P2|PRMT9_HUMAN GTAYAHYLLVLSAPELKHQVK-----ETFQYTLFRWAEELDA-LSRIQD-LL- 87

SP|096L8|PRMT6_HUMAN -----
SP|099873|PRMT1_HUMAN -----MAAAEAANCIMENFV-----ATLANGMSLOPP- 27
SP|P55345|PRMT2_HUMAN ---ADYAAT-----DIETQLSFL-----RGEK- 56
SP|060678|PRMT3_HUMAN QFDV---EDLVEYVSPFSPYPLGSDNTSV-VEKIKHME---ARALSAEAAALAPARE 132
SP|086X55|CARM1_HUMAN ---ALYSHEDV-CVFKCSVRETECSRVGKQSF-----ITLTKGNS- 106
SP|014744|PRMT5_HUMAN NAPTTHTTEYSGEKWTMMWH--NFRLLCDYSKRIJVALEIGADLPNSHIDRWLGEPIK 227
SP|09NV4|PRMT7_HUMAN -----
SP|09NR22|PRMT8_HUMAN -----MGMKHSRCLLLRRKMAE---NAAESTEVNSPPSOPP- 34
SP|06P2P2|PRMT9_HUMAN ---GCYEQALE-LFP---DDEVICNSM-----GE- 109

SP|096L8|PRMT6_HUMAN -----
SP|099873|PRMT1_HUMAN -----L---EE-----VSCGQ- 35
SP|P55345|PRMT2_HUMAN ---ILLRROTADWVW--G-----ERAGCCGYIPANHV 85
SP|060678|PRMT3_HUMAN ---LQMKQFAQDFVMHTD-----V--RTCSS- 204
SP|086X55|CARM1_HUMAN ---VLQFATPNDFCSFYV-----ILKTCRGTHERS- 135
SP|014744|PRMT5_HUMAN AAILPPTSIPLTNKKGFPVLSKMHQRLIFRLKLEVOFIITGTNHSEKFCFSYLYQLEY- 286
SP|09NV4|PRMT7_HUMAN -----MKIFCSR- 7
SP|09NR22|PRMT8_HUMAN -----QPVVPAKPVQCVHHVS-----TOPSCPR- 58
SP|06P2P2|PRMT9_HUMAN ---HLFRMG-----FRDEAAGYF-----124

SP|096L8|PRMT6_HUMAN REAALERPRRTKRERDQLYY---E-CYSDVSV-----HEEMLADRVRTDAYLGI 74
SP|099873|PRMT1_HUMAN --AESSEKPNADMSTKDYFY---D-SYAHFGI-----HEEMLDEKVRTLYRNSM 80
SP|P55345|PRMT2_HUMAN --KHVEYDPEDTWQDEEYF---G-SYGTLLK-----HLEMLADQPRTKYHSVI 129
SP|060678|PRMT3_HUMAN ---STSVIADLQDEDEGVYF---S-SYGHYGI-----HEEMLKDERTESYRDFI 247
SP|086X55|CARM1_HUMAN ---VFSERTEESSAVQYF---Q-YLYLSQ-----QNMMDVYRTGTQRAI 176
SP|014744|PRMT5_HUMAN ---LQNRPPPN---AYELFAKGYEYDLSPLQPLMDNESQTYEVFEKDPKIKYSQYQAI 341
SP|09NV4|PRMT7_HUMAN -----ANPTT---GSVENLEDEHYD-----YHQETARSSYADMHLKDRNRYKQGI 52
SP|09NR22|PRMT8_HUMAN --GKMSKLNPEMSTRDYFY---D-SYAHFGI-----HEEMLDEKVRTLYRNSM 103
SP|06P2P2|PRMT9_HUMAN --HKAVKLNPFDSADKENFY-RVANLWVERW-----HFIMLNDTKRNTIYNAI 170
: : : * : * :

SP|096L8|PRMT6_HUMAN LRW- ---AALAGKTVLDVCGAGTGILSIF---CAQAG-ARRVYVEASA--WQQA 120
SP|099873|PRMT1_HUMAN FWR- ---HLFKKVVLDVCGSGTGLSMF---AAKAG-ARKVIGIECSS--ISDYA 126
SP|P55345|PRMT2_HUMAN LQNK- ---ESLTDKVLVDVCGGTGILSIF---CAHYARPRVYVEASE--MAQHT 176
SP|060678|PRMT3_HUMAN YQNP- ---HIFKDKVLDVCGGTGILSMF---AAKAG-AKVLGVDOSE--ILYQA 293
SP|086X55|CARM1_HUMAN LQNH- ---TDFKDKVLDVCGCGSGLSFF---AAQAG-ARKTYAVEAST--MAQHA 222
SP|014744|PRMT5_HUMAN YKCLLDLRVPEEKDNTQVQLMVLGAGRGLVNASLRAAKQADRRILKLYAVENK-NAVVT 400
SP|09NV4|PRMT7_HUMAN RAAV--SRVK---DRGOKALVLDIGTGTGLSM- ---AVTAG-ADFYAEVFKPMADAA 103
SP|09NR22|PRMT8_HUMAN YHNK- ---HVFKDKVLDVCGSGTGLSMF---AAKAG-AKVFGEICSS--ISDYS 149
SP|06P2P2|PRMT9_HUMAN -QKA- ---VCLGSKVLDIGAGTGILSMF---AKKAG-AHSVYACELSKTYELA 216
: : * * * : : :

SP|096L8|PRMT6_HUMAN REVVRFNGLEDRVHVLPGPVETVLP-----EQVDIVSEWMGYLLHESMLSSVLHAR 174
SP|099873|PRMT1_HUMAN VKIVKANKLDHVVTIIGKVEEVELP---V---EKVDIIISEWMGYCLFYESMLNTLYAR 181
SP|P55345|PRMT2_HUMAN GOLVLONGFADITVYQKVEDVLP-----EKVDVIVSEWMGTCLLFEFMIESLYAR 230
SP|060678|PRMT3_HUMAN MDIIRLNKLEDITILIKGKIEEVHLP---V---EKVDVISEWMGYLLFESMLDSVLYAK 348
SP|086X55|CARM1_HUMAN EVLVKSNMLTDRIVVTPGKVEEYSLP-----EQVDIIISEWMGYLLFNERMLESYLHAK 276
SP|014744|PRMT5_HUMAN LENWQFEWGSQVTVSSDMREWAP-----EKADIIIVSELLGSAFDELSP-CLDGA 453
SP|09NV4|PRMT7_HUMAN VKIVEKNGFSKIKVINKHSTEVTVGPEGDMPCRAMILVTELFDELIGEGALPSYEHAAH 163
SP|09NR22|PRMT8_HUMAN EKIKANHLNDIITIFGKVEEVELP---V---EKVDIIISEWMGYCLFYESMLNTLYAR 204
SP|06P2P2|PRMT9_HUMAN CDVVAANKMEAGIKLLHTKSLDIEIP---KHIPERVLVVTETVDAGLFGEGIVESLIHAW 274
: : : : : * :

SP|096L8|PRMT6_HUMAN TKWLK-----EGLLLPASAEFLIAPISDQ-MLEW---RLGFWSQVKHQHYVD 218
SP|099873|PRMT1_HUMAN DKWLA-----PGLIFPDRATLYVTAIEDROYKDY---KTHWENV---YGF 223
SP|P55345|PRMT2_HUMAN DAWLK-----EDGIVPMAALHLVPCSDKDYRS---KVLFDMA---YEF 272
SP|060678|PRMT3_HUMAN NKYLA-----KGSVYDICTISLVSVDVNHKAD---RFAWDDV---YGF 390
SP|086X55|CARM1_HUMAN -KYLK-----PSGNMFPITGDVHLAPFTDEQLYMEQFTKANFYQPS--FHGVD 322
SP|014744|PRMT5_HUMAN QHFLK-----DDGVSIPGEYTSFLAPISSEKLYNEVR-----485
SP|09NV4|PRMT7_HUMAN RHLVE-----ENCEAVPHRATVYAQLVESGRMWSNWK---LFPFHVQ-----202
SP|09NR22|PRMT8_HUMAN DKWLK-----PGLMFPDRAALVYVAIEDROYKDF---KTHWENV---YGF 246
SP|06P2P2|PRMT9_HUMAN EHLLLQPKTKGESANCEKYGKVPASAVIFGNAVECAEIRRH-----HRVG 320
: : *

SP|096L8|PRMT6_HUMAN MSCLEGFATRC-----LMGHSEIVV---OGL-----SGEDVLARPORFALE 257
SP|099873|PRMT1_HUMAN MSCIKDVAIKE-----PL---V---DVV-----DPKOLVTNACLKEVD 256
SP|P55345|PRMT2_HUMAN LSALKSLAVKE-----FFSKPKY-N---HIL-----KPEDCLSEPTLQLD 310
SP|060678|PRMT3_HUMAN MSCMKKAVIPE-----AV---V---EVL-----DPKTLISEPCGKIHID 423
SP|086X55|CARM1_HUMAN LSLALGAADV-----YFRQPVDT-----FDI-----RI---LMAKVS---KYT 356
SP|014744|PRMT5_HUMAN -ACREKDRDPE-A---QFEMPYVRLHNFHQL-----SAPO-----PCFTFSPHN 525
SP|09NV4|PRMT7_HUMAN TSLGEQIVPPYDVESCPGAPSCDQL-NDV-----SPADFTVLSVLPWFST 251
SP|09NR22|PRMT8_HUMAN MTCIRDVARKK-----PL---V---DIV-----DPKQVYTNACLKEVD 279
SP|06P2P2|PRMT9_HUMAN IKDIAGIHLPTNV---KFOQSPAYSVQDTEETEPYTTTEKMSRVPGGYLLATECFEDMTVD 377

```

```

SP |096L8| PRMT6_HUMAN LSRAGLEQELEAGVGGFRFCSCYGSAPMHGFAIWFQVTFPGG--ESEK-PLVLSTSPF- 312
SP |099873| PRMT1_HUMAN IYTVKVED---LTFSTPFCLQVKNRNDYVHALVAYFNIEFT-R---CHK-RTGFSTSP- 306
SP |P55345| PRMT2_HUMAN MRTVQIS--DLETLRGLERFDIRKAGTLHGFTAMFVHFQSLQ--EGOP--PQVLSGPF- 364
SP |060678| PRMT3_HUMAN CHTTSISD---LEFSSDFTLKITRTSMCTAIAGYFDIYFEKN---CHN-RVVFSTGPD- 474
SP |086X55| CARM1_HUMAN VNFLEAKEGDLHRIEIPKFFHMLHSGLVHGLAFWFDVAFIGS---IM-TVWLSSTAPT- 409
SP |014744| PRMT5_HUMAN ---RDPMDNNRYCTLEFPVEVNTVLHGAFYFETVLYQD-----TTLIRPET 571
SP |09NV44| PRMT7_HUMAN FSKQVSS---SAACHSRRFELTSGRAQVLSWMDIEMDPEGKIKCTMAPFAHSIDPE- 306
SP |09NR22| PRMT8_HUMAN IYTVKTEE---LSFTSAFCLQIQNDYVHALVYFNIEFT-K---CHK-KKGFSTAPD- 329
SP |06P2P2| PRMT9_HUMAN FNNLQELKSLATKKPKDKIGIPVIEKIGLDAIMVWFVLQDDE-----HSLSTSPS- 427
          *
          :
          :

SP |096L8| PRMT6_HUMAN --HPATHWKQALLYLNEPV--QEQDQDVSGETLLPSRDNPRRLRV-----L--- 356
SP |099873| PRMT1_HUMAN --SPYTHWKQTVFYMEDYL--TVKTGEEIFGTIQMRPNNAKNNRDLDF-----T--- 350
SP |P55345| PRMT2_HUMAN --HPTTHWKQTLFMMDDPV--PVHTGDVVTGSVVLQRNPVWRHMSV-----A--- 408
SP |060678| PRMT3_HUMAN --STKTHWKQTVFLLEKPF--SVKAGEALGGKVTVHKNKDKDPRSLTV-----T--- 518
SP |086X55| CARM1_HUMAN --EPLTHWYQVRCLFQSPLE--FAKAGDTLSGTCLLIANRQSYDLSI-----V--- 453
SP |014744| PRMT5_HUMAN HSPGMFSWFFLFLPIKQPI--TVREGQITCVRFNRCSN-----SKKV----- 611
SP |09NV44| PRMT7_HUMAN EMQWRDHWMCQVYFLPOEE--PVVQGSALYLVAHDDYD-----C----- 343
SP |09NR22| PRMT8_HUMAN --APYTHWKQTVFYLEDYL--TVRRGEEIYGTISMKPNAKNVRDLDF-----T--- 373
SP |06P2P2| PRMT9_HUMAN ---EETCWEQAVYPVQDLADYWKPGDHVMMEVSCQDCYLRIQISVVLGLECEMDVAKSF 484
          *
          .
          .
          :

SP |096L8| PRMT6_HUMAN -----LRYKVGD-----QEEKTKDFAMED----- 375
SP |099873| PRMT1_HUMAN -----IDLDFKG-----QLCELSGSD-----YRM-R----- 371
SP |P55345| PRMT2_HUMAN -----LSWAVTS-----RQDPTSQKVGKVFPI-----WR----- 433
SP |060678| PRMT3_HUMAN -----LTLNNSI-----QTYGLO-----FRY-TGTTPS 531
SP |086X55| CARM1_HUMAN -----AQVDQT-----GSKSNLLDLKNPF-----FRY-TGTTPS 482
SP |014744| PRMT5_HUMAN -----WYEWAVTA-----PVCSAIHNPGRSYTI----- 635
SP |09NV44| PRMT7_HUMAN -----VMYSLQRTSPKNERVRQMRPVCDCAHLWNRPRFGEINDQDRDRYVQALRTVL 399
SP |09NR22| PRMT8_HUMAN -----VDLDFKG-----QLCETSVND-----YKM-R----- 394
SP |06P2P2| PRMT9_HUMAN TQNKDLLSLGNEA-----ELCSALANL-----QTSKPD 512

SP |096L8| PRMT6_HUMAN -----
SP |099873| PRMT1_HUMAN -----
SP |P55345| PRMT2_HUMAN -----
SP |060678| PRMT3_HUMAN -----
SP |086X55| CARM1_HUMAN PPPGSHYTPSENMMWNTGSTYNNLSGMAVAGMPT-----AYDL---SSVIASGSSVGN 533
SP |014744| PRMT5_HUMAN -----GL----- 637
SP |09NV44| PRMT7_HUMAN KPDSVCLCV--SDGSLLSVLAHHLGVEQ-----VFTV-----ESSAASH 436
SP |09NR22| PRMT8_HUMAN -----
SP |06P2P2| PRMT9_HUMAN AVEQTCILESTEIALLNNIPYHEGFKMAMSKVLSLTPKLYQTMTHCONMSSGTGQS 572

SP |096L8| PRMT6_HUMAN -----
SP |099873| PRMT1_HUMAN -----
SP |P55345| PRMT2_HUMAN -----
SP |060678| PRMT3_HUMAN -----
SP |086X55| CARM1_HUMAN N-----LIPLANTGIVNHTSRMGSIMSTGIVQGS SGAQGSGGGSTSAHYANWSQFTMG 588
SP |014744| PRMT5_HUMAN -----
SP |09NV44| PRMT7_HUMAN K-----LLRKFKAN-----HLEDKINIEKRPPELLTNEQLGR-----KVSLLLGE 478
SP |09NR22| PRMT8_HUMAN -----
SP |06P2P2| PRMT9_HUMAN NTVQNILEPFVYLDVS-EG-----FVSLPVITAGTLGQVKPYSS-----VEKDQRIAL 619

SP |096L8| PRMT6_HUMAN -----
SP |099873| PRMT1_HUMAN -----
SP |P55345| PRMT2_HUMAN -----
SP |060678| PRMT3_HUMAN -----
SP |086X55| CARM1_HUMAN PAISMASPMSPNTMTHYGS----- 608
SP |014744| PRMT5_HUMAN PFF-----TTSLLPWHNLFYWYVRTAVDQ----- 502
SP |09NV44| PRMT7_HUMAN -----
SP |09NR22| PRMT8_HUMAN DLIS--EANHFPKETLEFWLRHVEDESM LQRPKSOKLWSIIILDVIEPSGLIQEIMEK 677
SP |06P2P2| PRMT9_HUMAN -----

SP |096L8| PRMT6_HUMAN -----
SP |099873| PRMT1_HUMAN -----
SP |P55345| PRMT2_HUMAN -----
SP |060678| PRMT3_HUMAN -----
SP |086X55| CARM1_HUMAN -----
SP |014744| PRMT5_HUMAN -----
SP |09NV44| PRMT7_HUMAN -----HLGPGAMVMPQAASLHAVVVEFRDLWRIRSPGDCCEGFDVHIMDDMIKRALDFR 556
SP |09NR22| PRMT8_HUMAN -----
SP |06P2P2| PRMT9_HUMAN AAI5RCLLQSGGKIFPQYVLMFGLLVESQTLLEENAVOGTERTLGLNIAPFINQ----F- 732

SP |096L8| PRMT6_HUMAN -----
SP |099873| PRMT1_HUMAN -----
SP |P55345| PRMT2_HUMAN -----
SP |060678| PRMT3_HUMAN -----
SP |086X55| CARM1_HUMAN -----
SP |014744| PRMT5_HUMAN -----
SP |09NV44| PRMT7_HUMAN ESREAEPHLLWEYPCRSLSPEWQILTFDFQPVPLOPLCAEGTVELRRPGQSHAAVLWME 616
SP |09NR22| PRMT8_HUMAN -----
SP |06P2P2| PRMT9_HUMAN QVP1RVFLDLSLPC1PLSKPVELLRLDLMTFV LNTS-NREKVVYCKSGRLTAIPFWYH 791

SP |096L8| PRMT6_HUMAN -----
SP |099873| PRMT1_HUMAN -----
SP |P55345| PRMT2_HUMAN -----
SP |060678| PRMT3_HUMAN -----
SP |086X55| CARM1_HUMAN -----
SP |014744| PRMT5_HUMAN -----
SP |09NV44| PRMT7_HUMAN YHLTPECTLSTGLLEPADPEGGCCWPHCKQAVYF5SPAPDRALLGGPRTVSYAVEFHP 676
SP |09NR22| PRMT8_HUMAN -----
SP |06P2P2| PRMT9_HUMAN MYLDEEIRLDTSS-----EASHWQA-----AV-----VLNPTQVEMGE----- 626

SP |096L8| PRMT6_HUMAN -----
SP |099873| PRMT1_HUMAN -----
SP |P55345| PRMT2_HUMAN -----
SP |060678| PRMT3_HUMAN -----
SP |086X55| CARM1_HUMAN -----
SP |014744| PRMT5_HUMAN -----
SP |09NV44| PRMT7_HUMAN DTGDIIMEFRHADTPD----- 692
SP |09NR22| PRMT8_HUMAN -----
SP |06P2P2| PRMT9_HUMAN ---ELVLSIQHHKSNVSITVKQ 845

```

**Supplementary Figure 1.** Sequence alignment of 9 PRMTs. The alignment indicates Cys50 in PRMT6 is a unique cysteine residue to be targeted by an irreversible inhibitor.

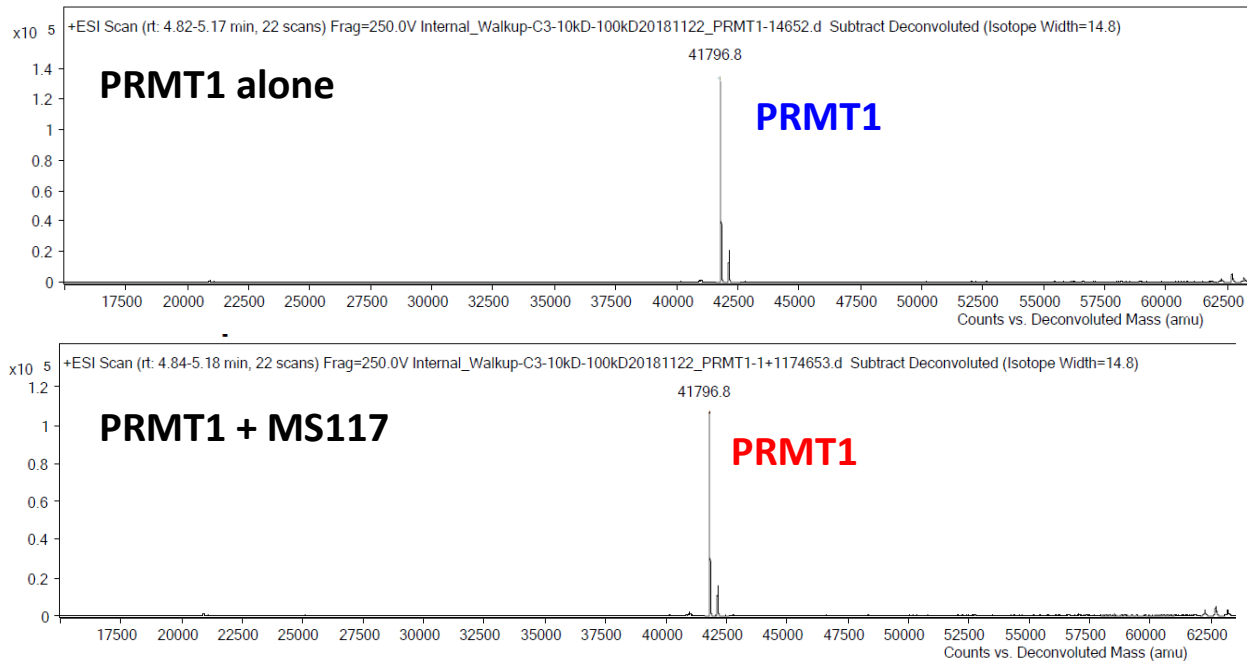

Supplementary Figure 2. MS assay results for PRMT1 incubated with compound 4 (MS117).

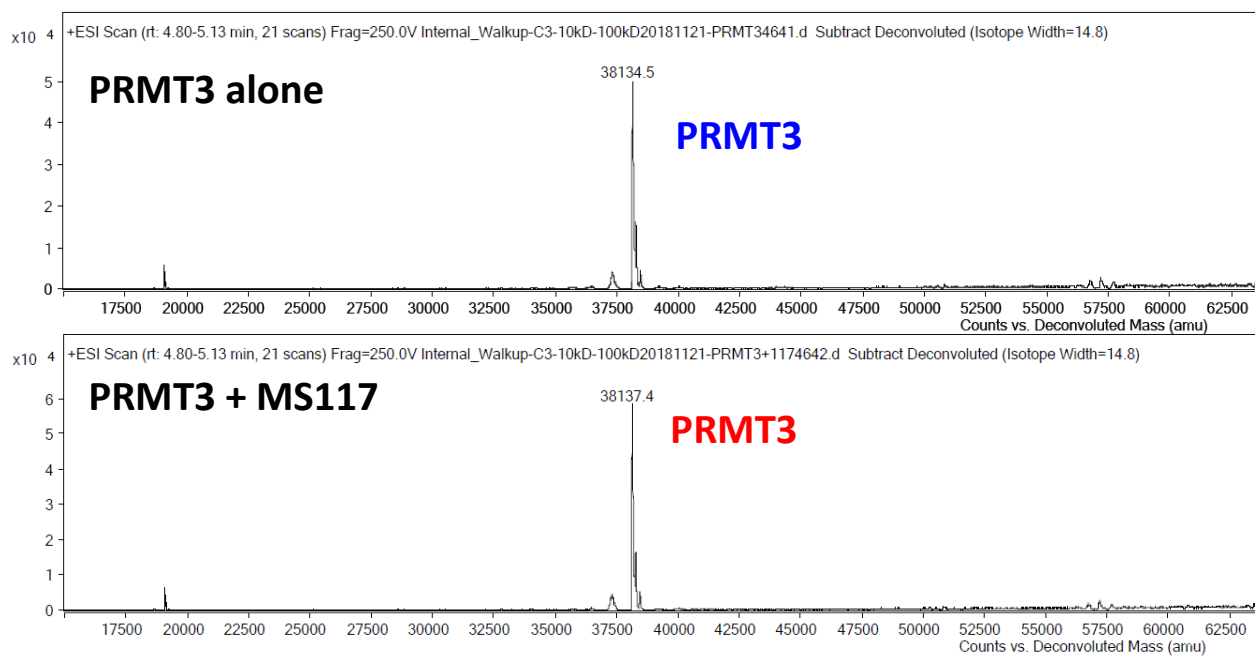

Supplementary Figure 3. MS assay results for PRMT3 incubated with compound 4 (MS117).

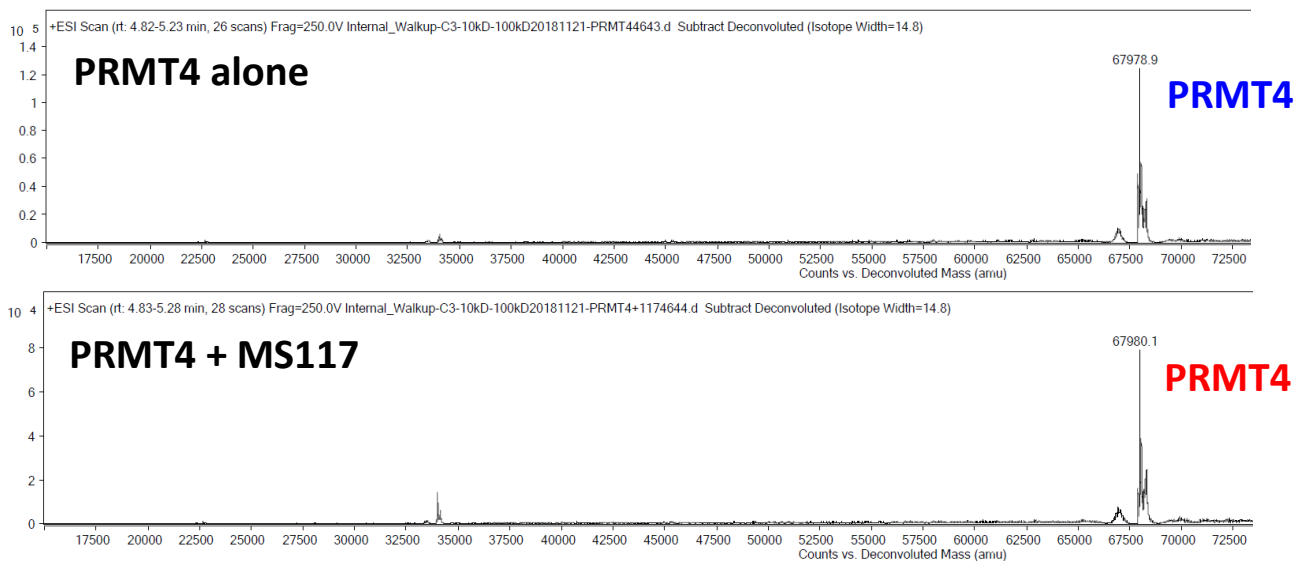

**Supplementary Figure 4. MS assay results for PRMT4 incubated with compound 4 (MS117).**

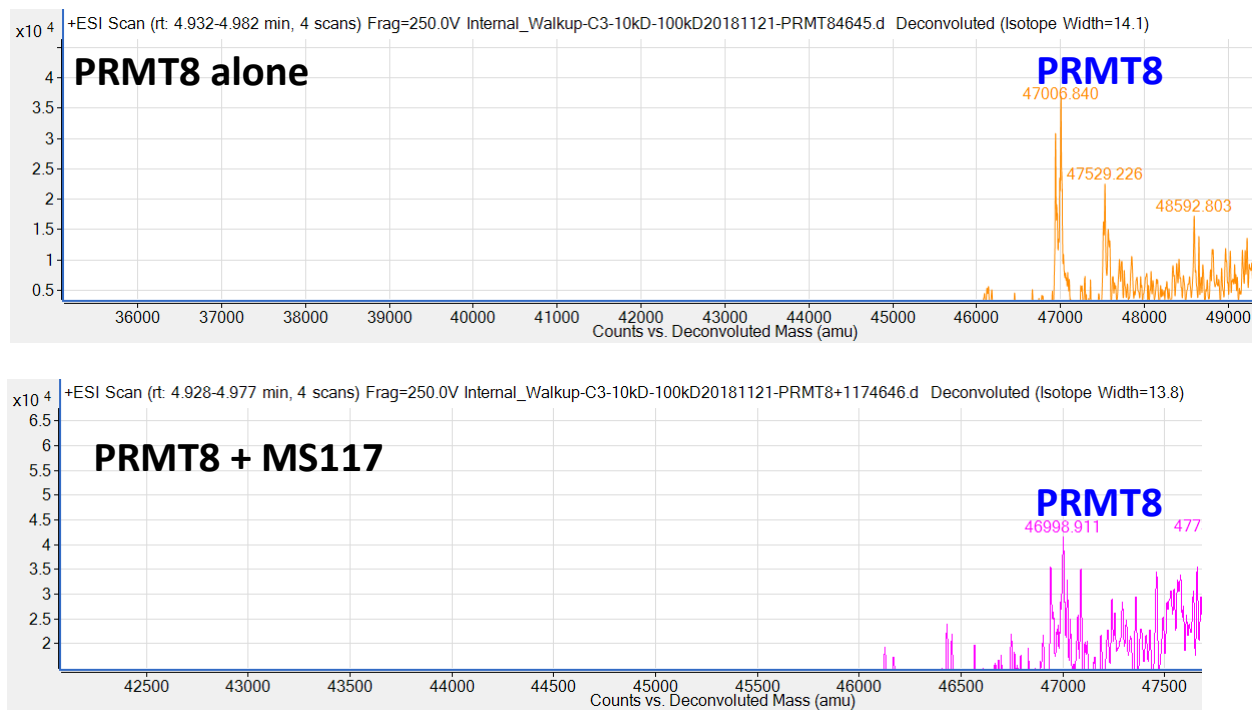

**Supplementary Figure 5. MS assay results for PRMT8 incubated with compound 4 (MS117).**



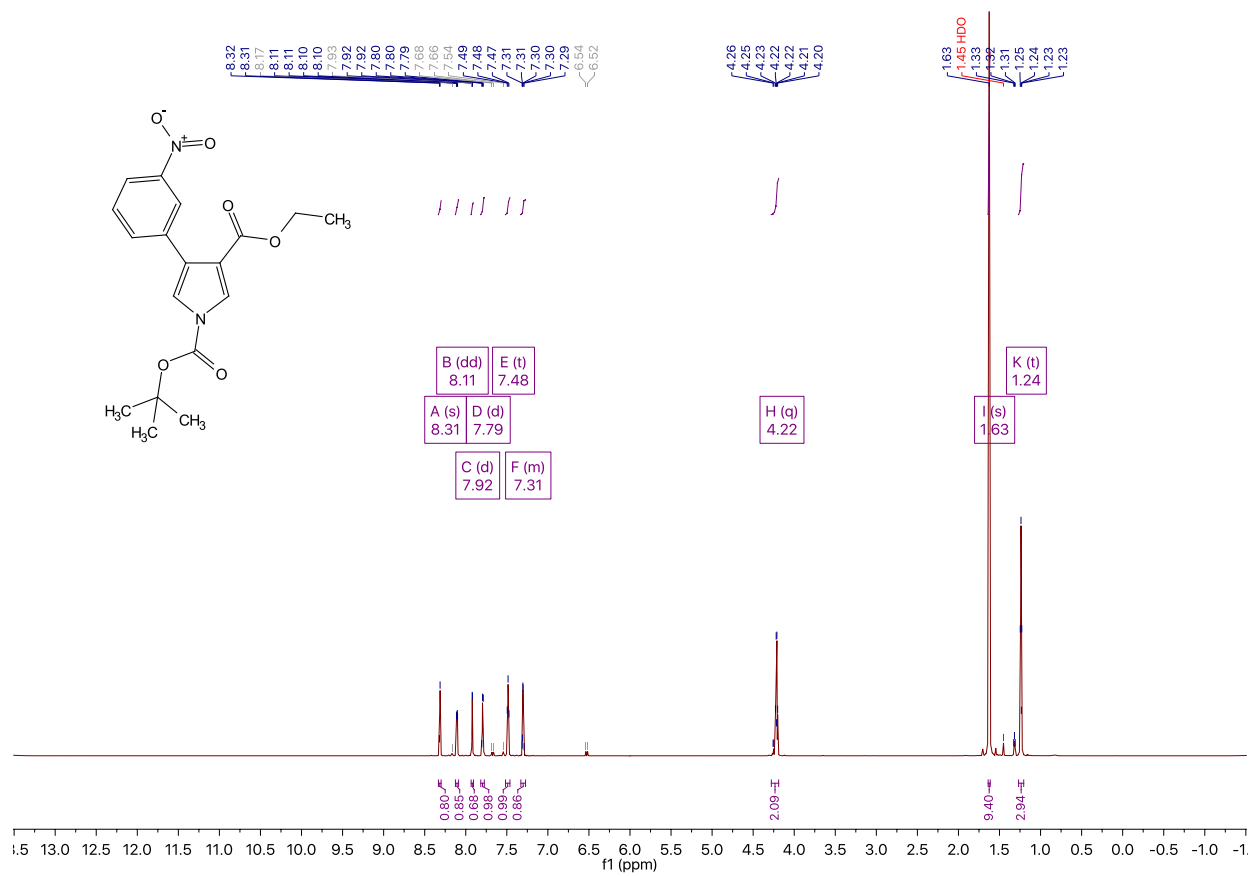

Supplementary Figure 6. <sup>1</sup>H NMR spectrum of compound 1.

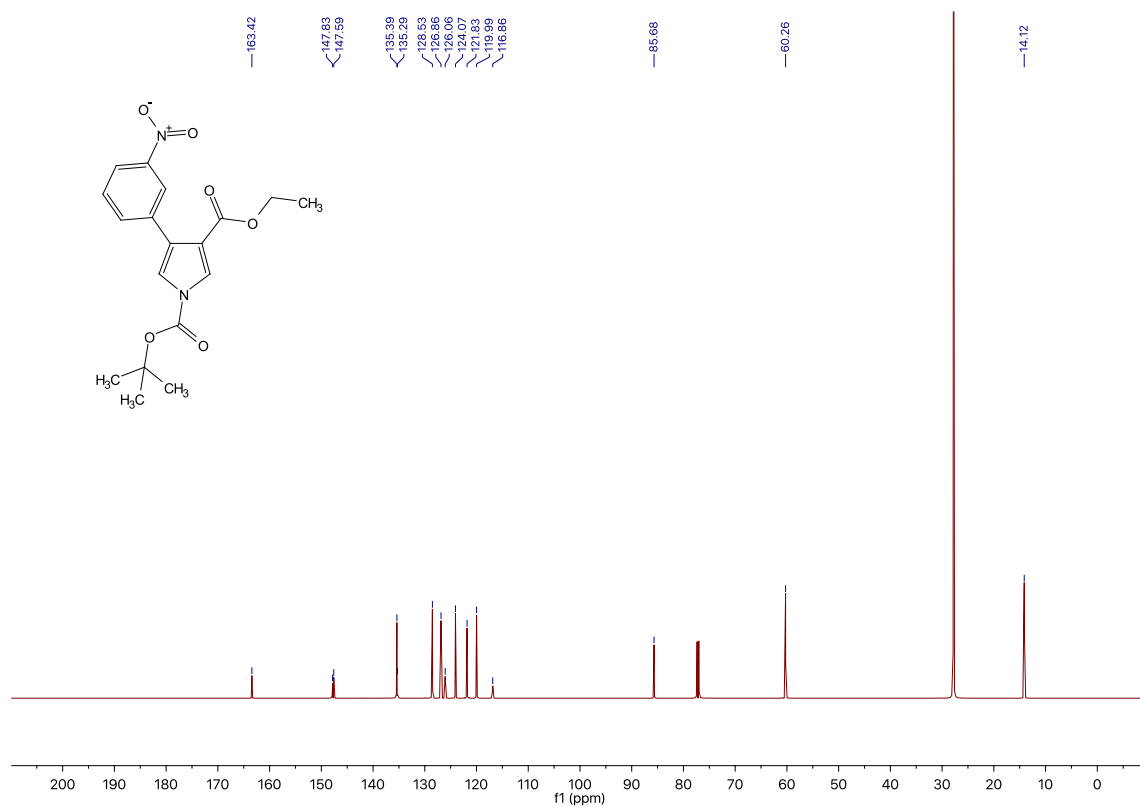

Supplementary Figure 7. <sup>13</sup>C NMR spectrum of compound 1.

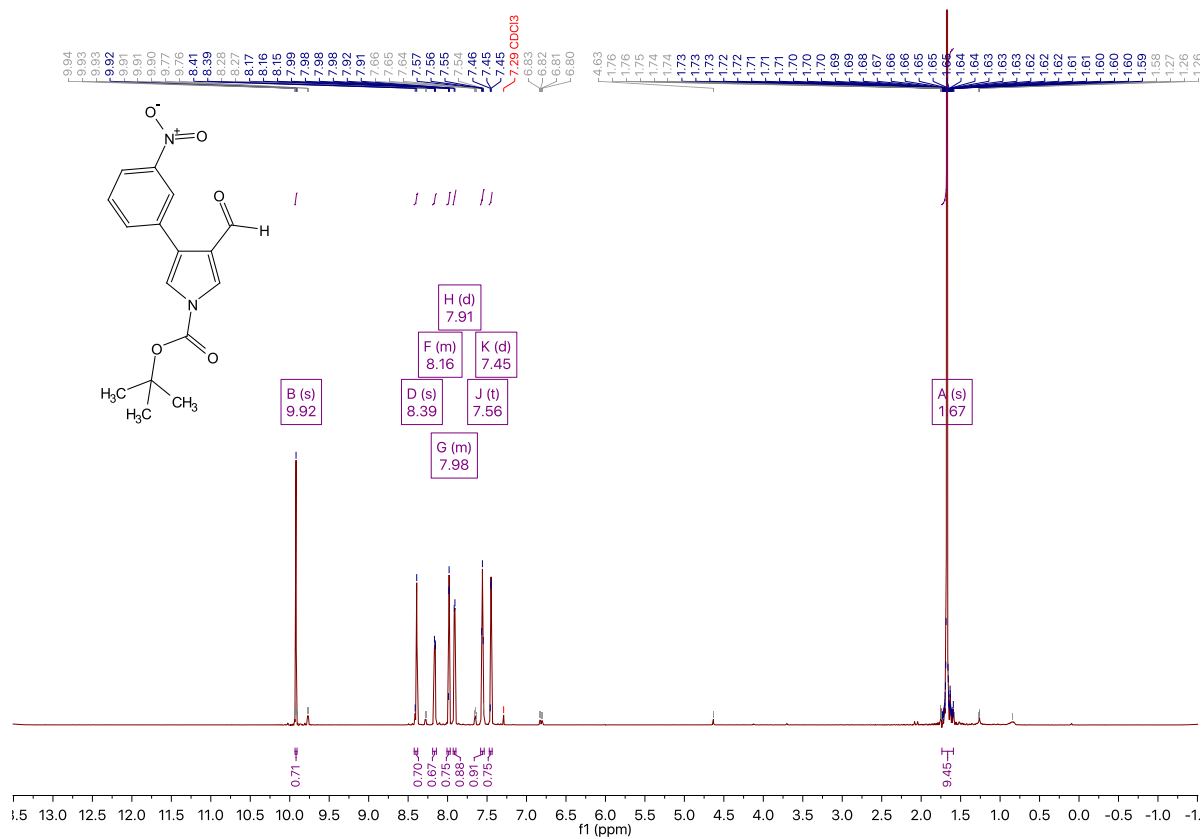

Supplementary Figure 8. <sup>1</sup>H NMR spectrum of compound 2.

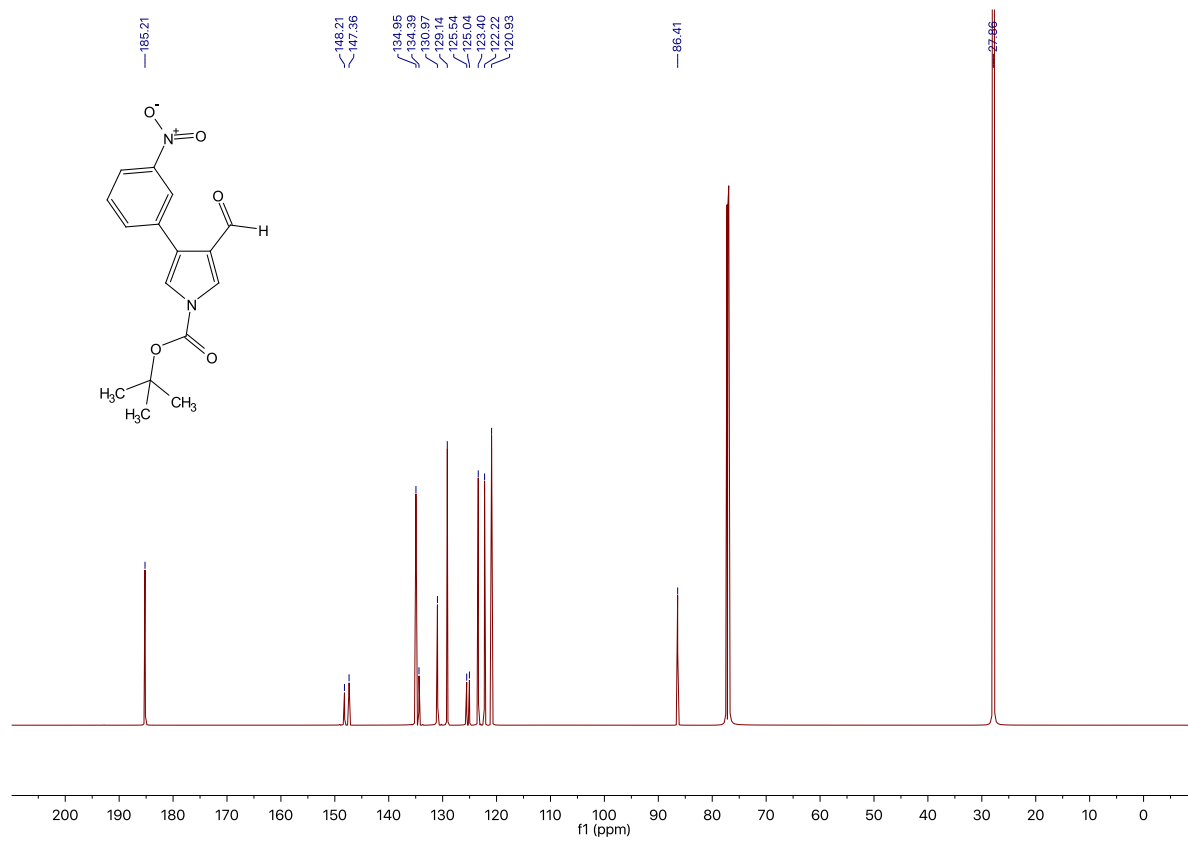

**Supplementary Figure 9.** <sup>13</sup>CNMR spectrum of compound 2.

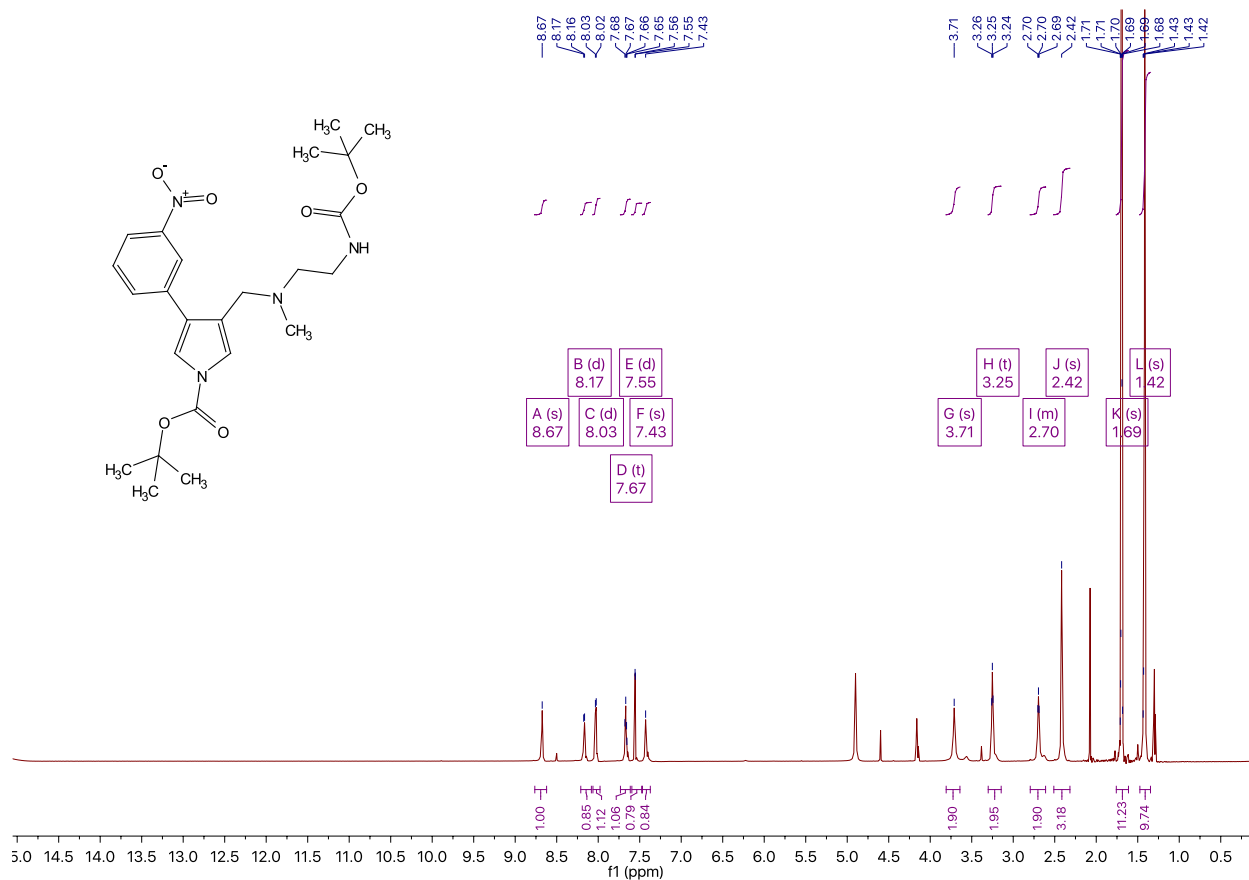

**Supplementary Figure 10.** <sup>1</sup>H NMR spectrum of compound 3.

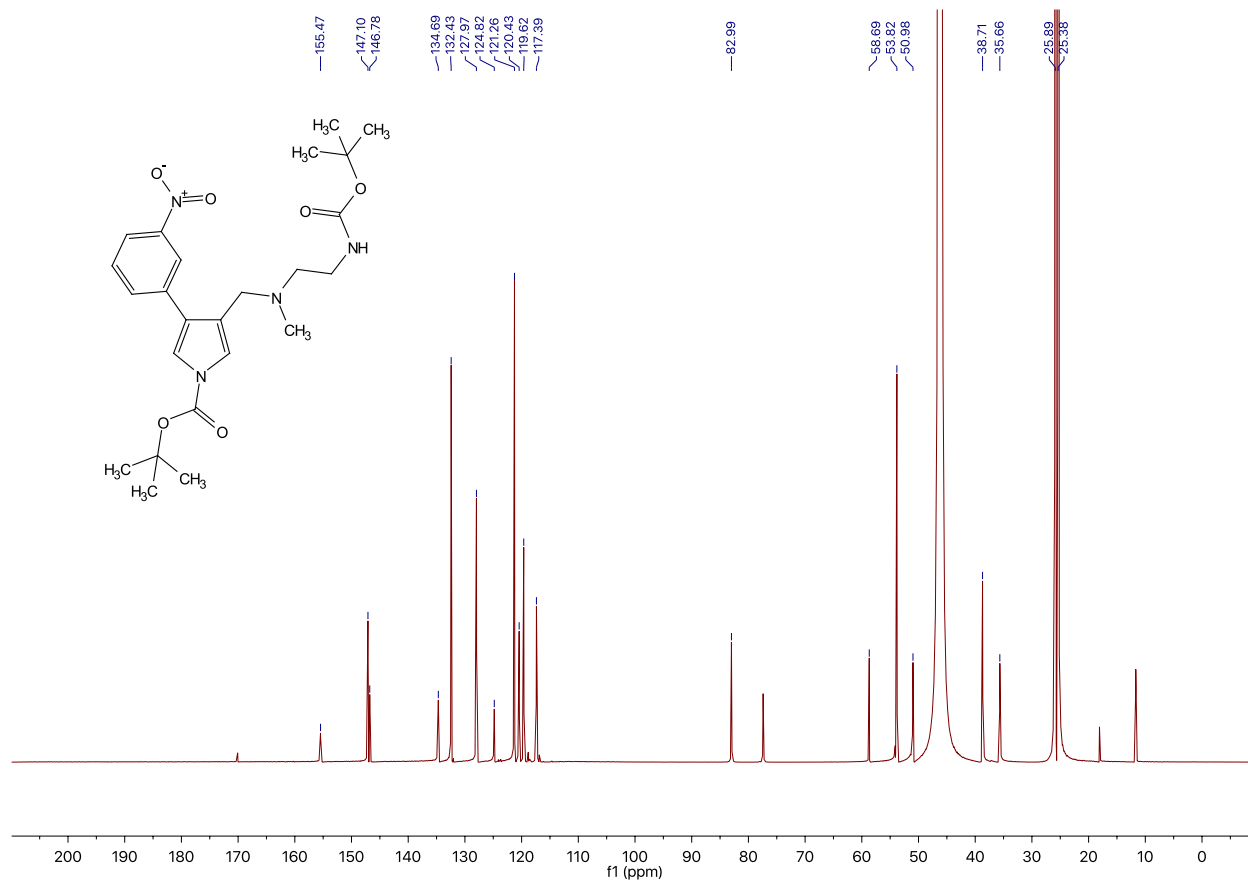

**Supplementary Figure 11.** <sup>13</sup>CNMR spectrum of compound **3**.

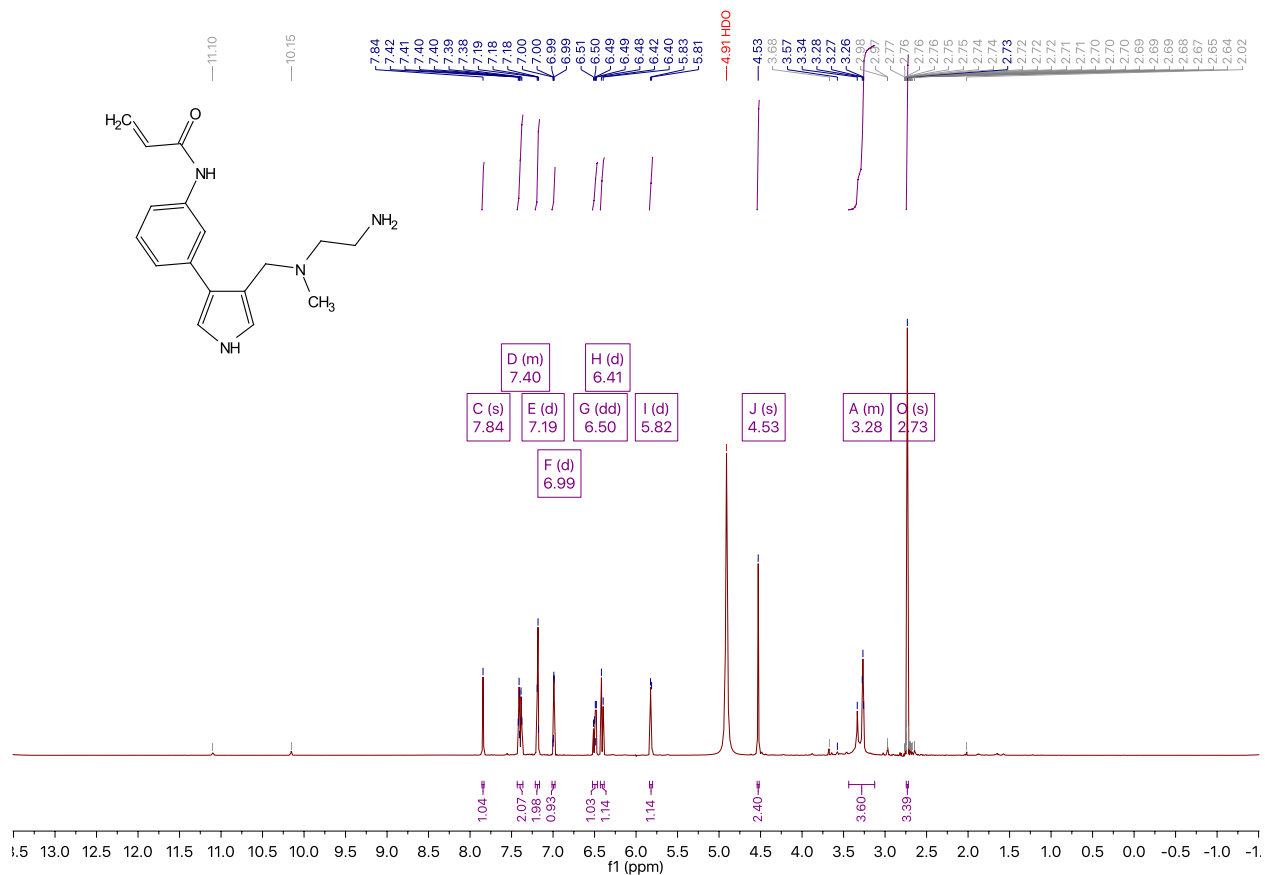

Supplementary Figure 12. <sup>1</sup>H NMR spectrum of compound 4.

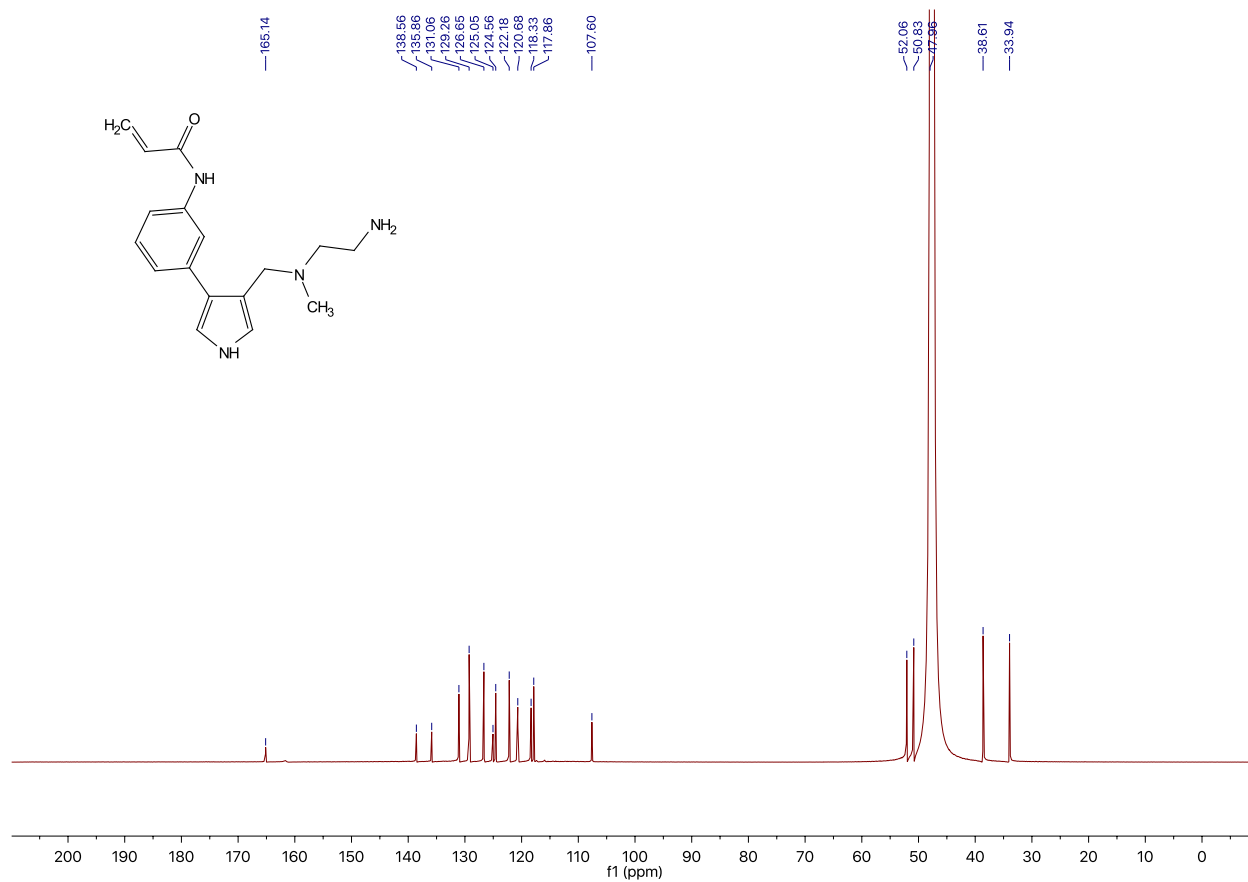

Supplementary Figure 13. <sup>13</sup>CNMR spectrum of compound 4.



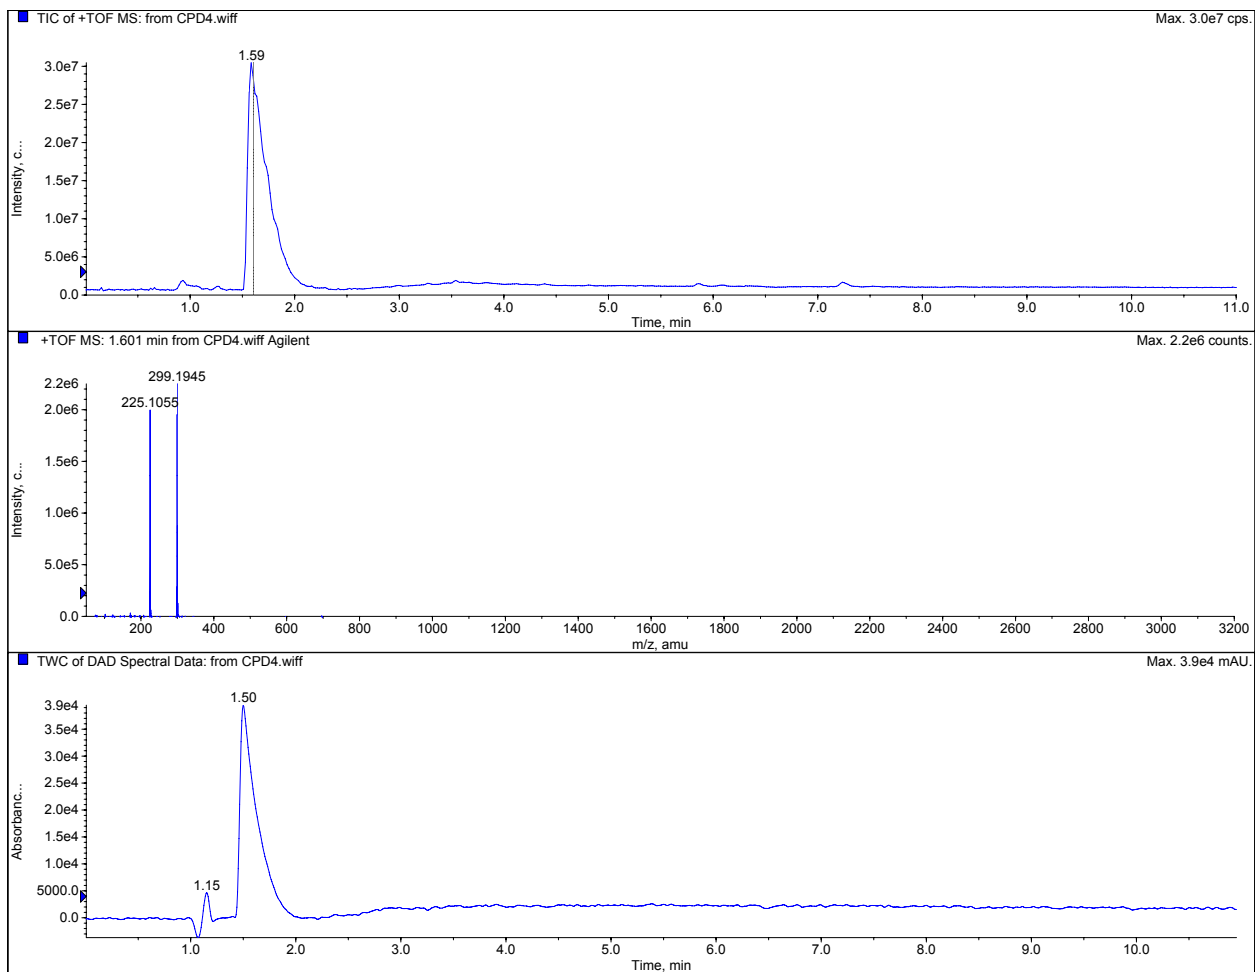

Supplementary Figure S14. HPLC-HRMS spectrum of compound 4.

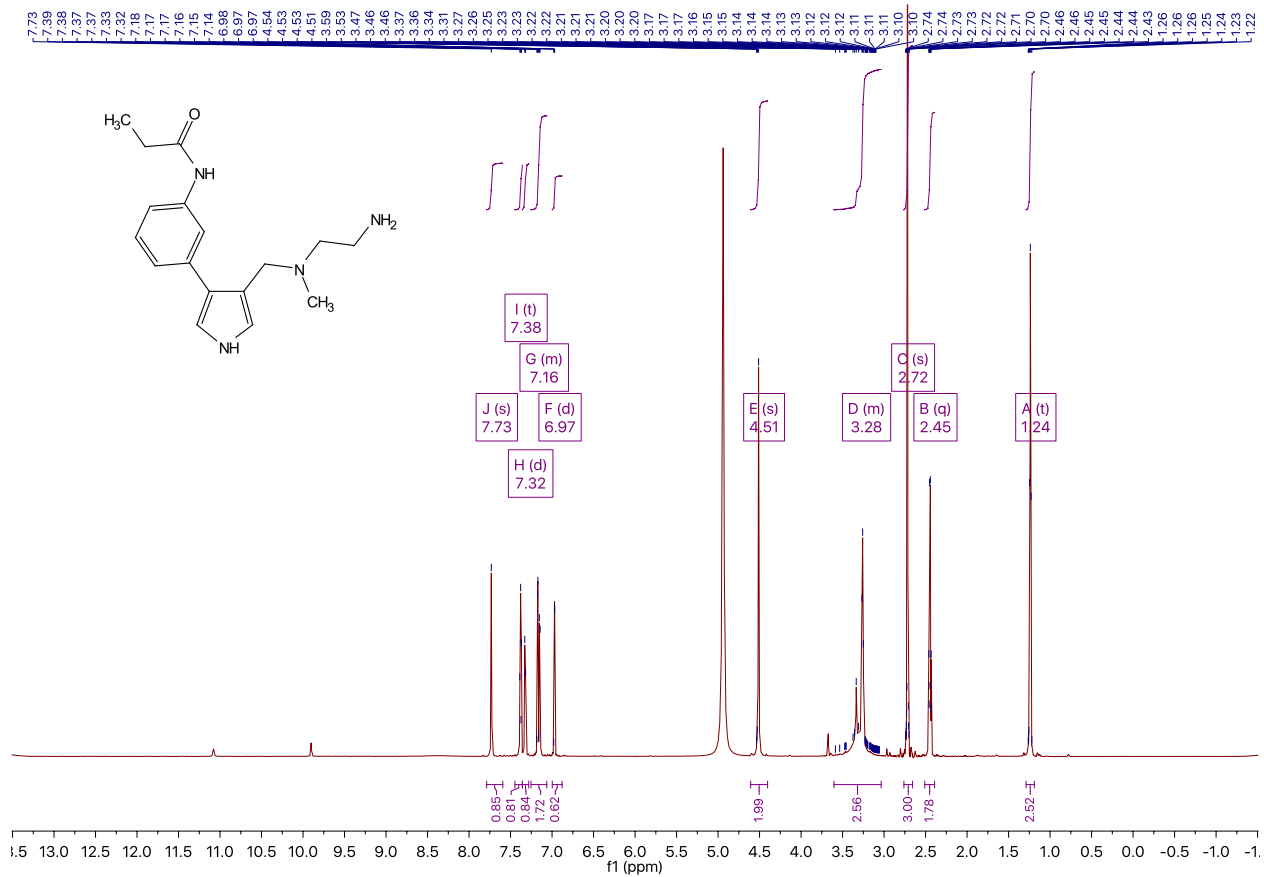

Supplementary Figure 15. <sup>1</sup>H NMR spectrum of compound 5.

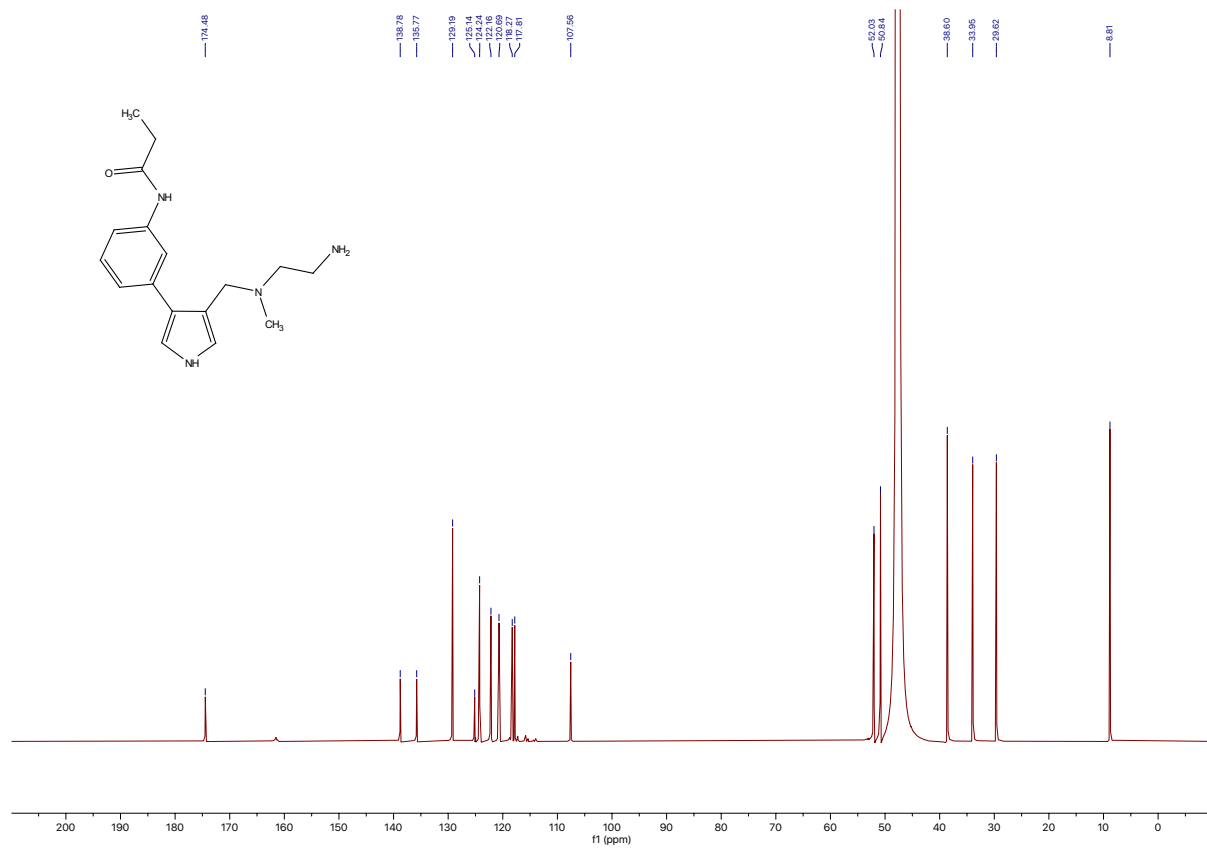

Supplementary Figure 16. <sup>13</sup>CNMR spectrum of compound 5.

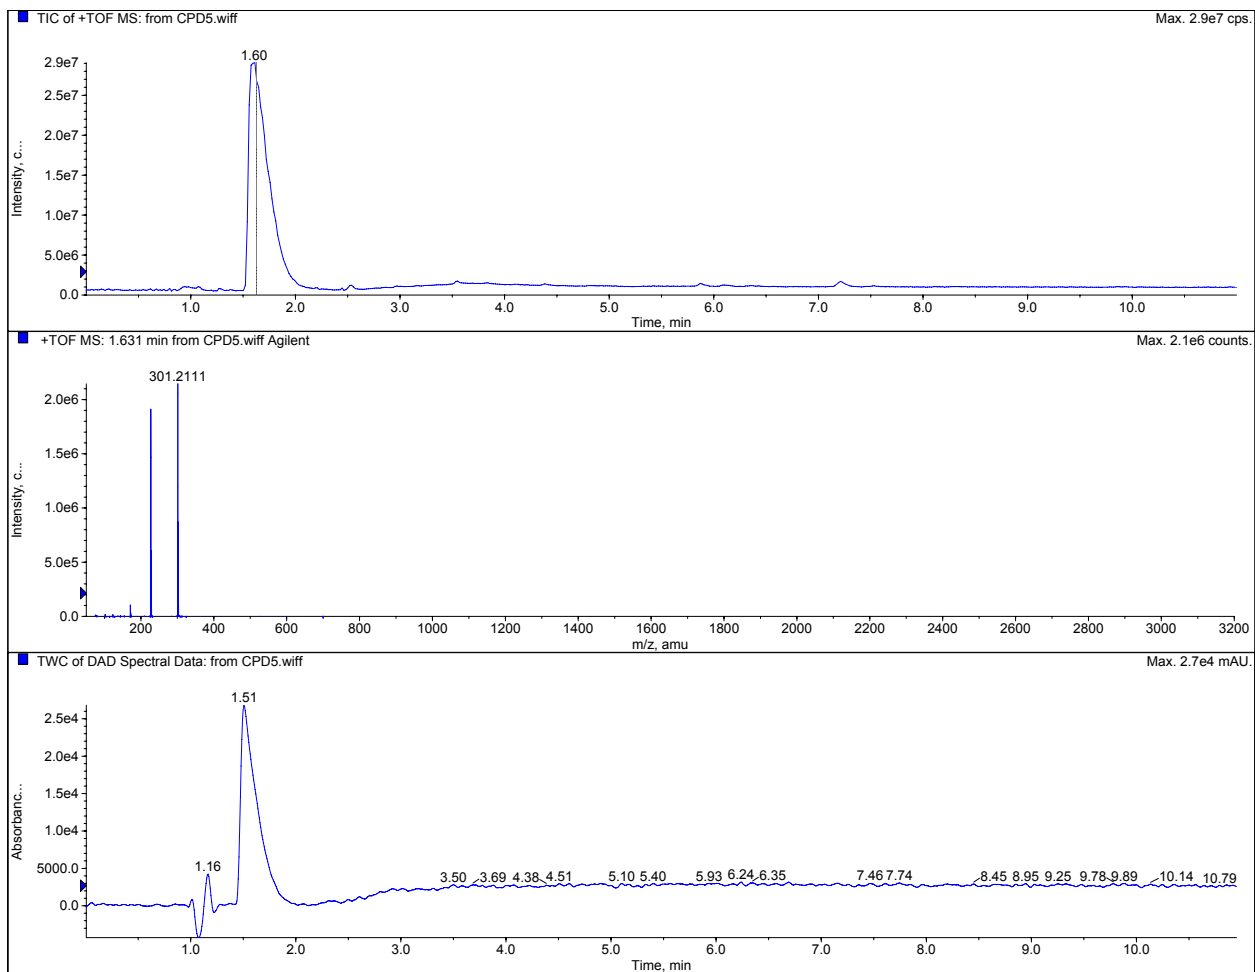

Supplementary Figure S17. HPLC-HRMS spectrum of compound 5.

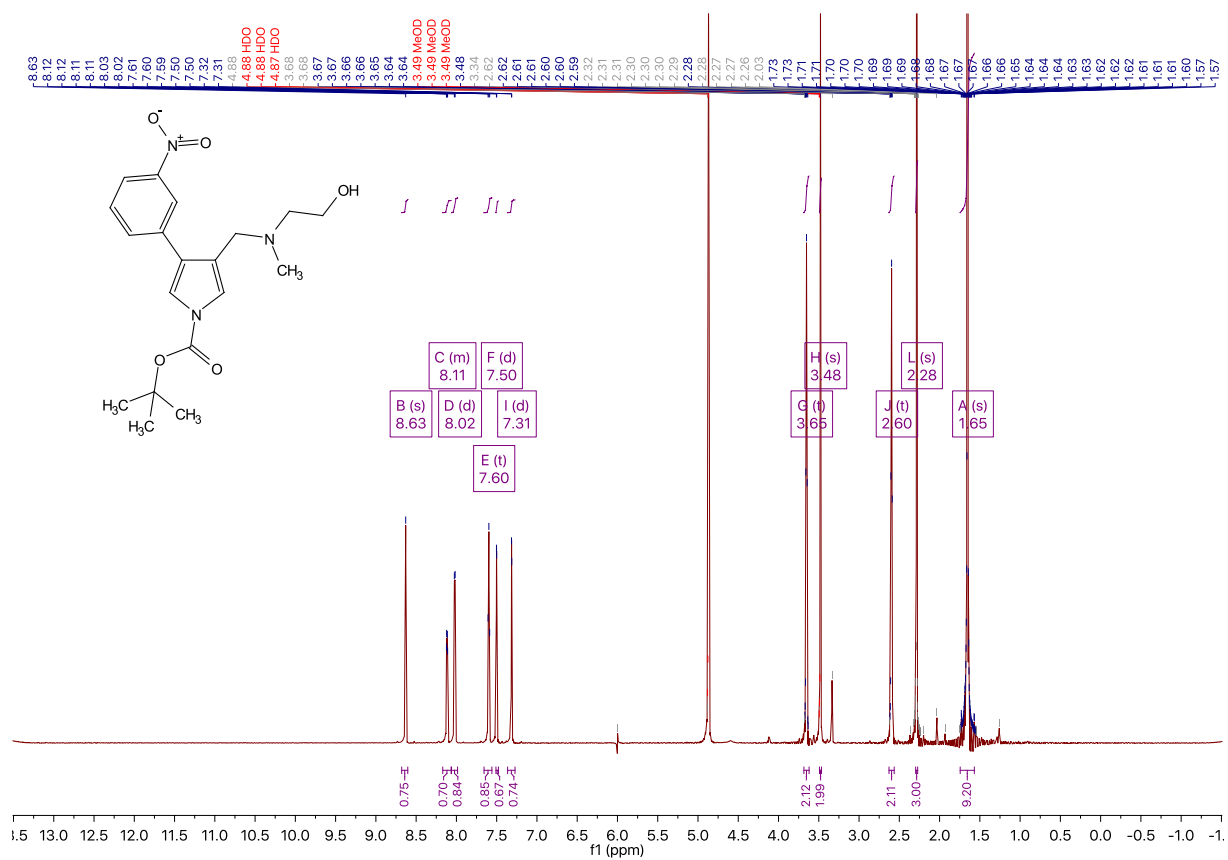

Supplementary Figure 18. <sup>1</sup>H NMR spectrum of compound 6.

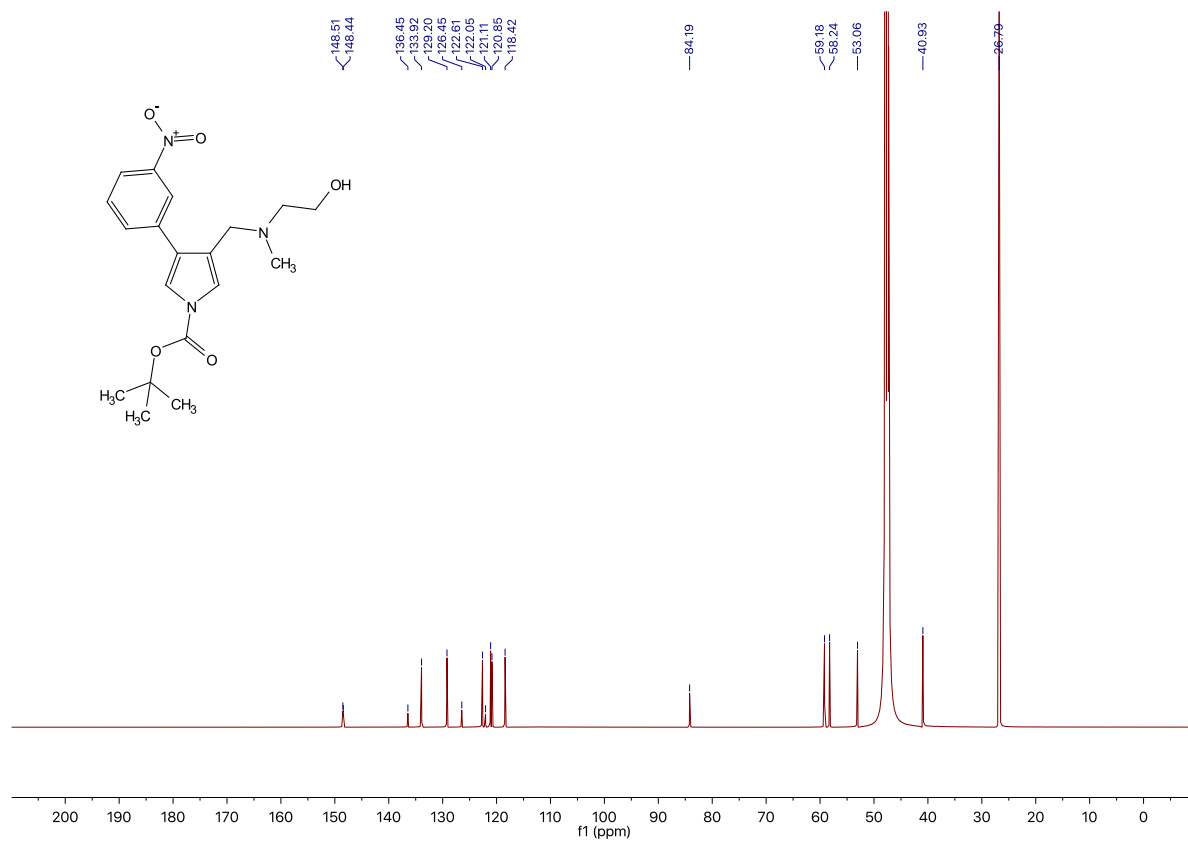

Supplementary Figure 19. <sup>13</sup>CNMR spectrum of compound 6.

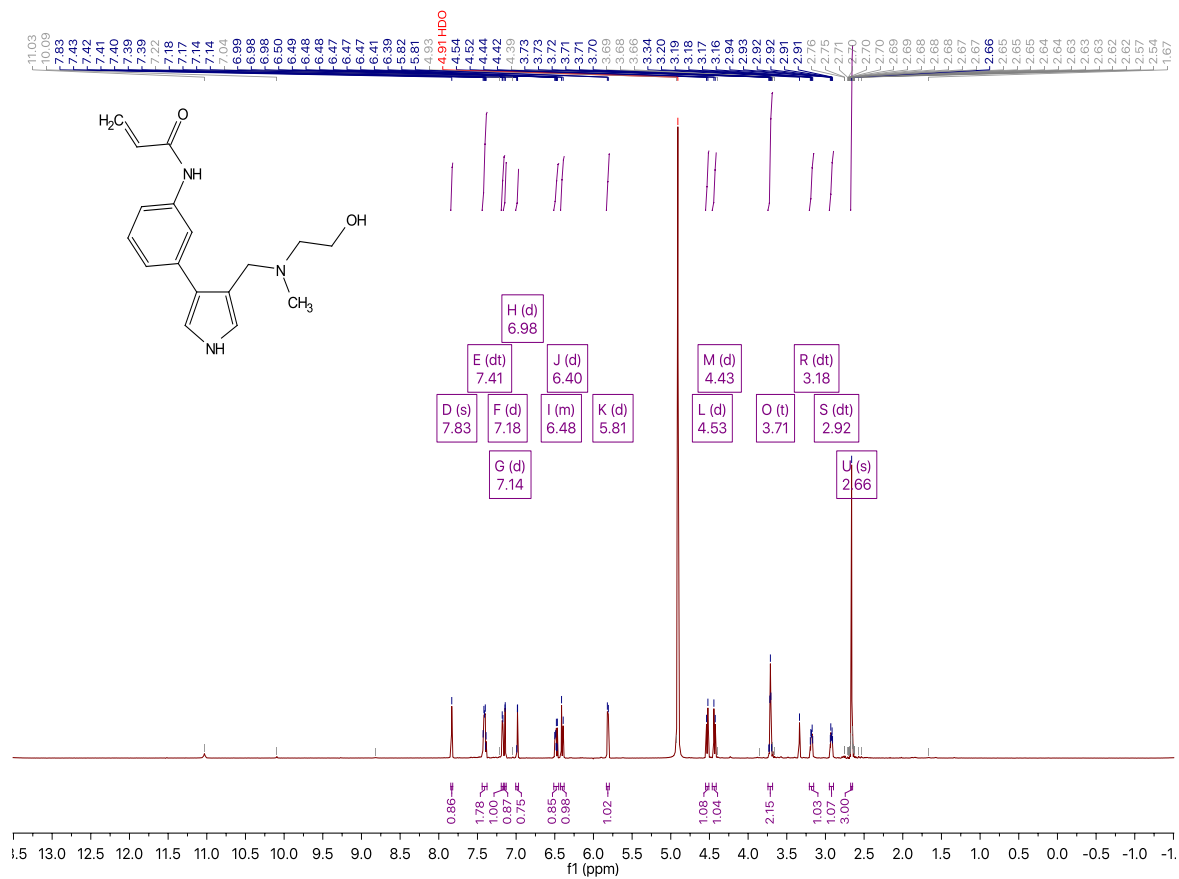

Supplementary Figure 20. <sup>1</sup>H NMR spectrum of compound 7.

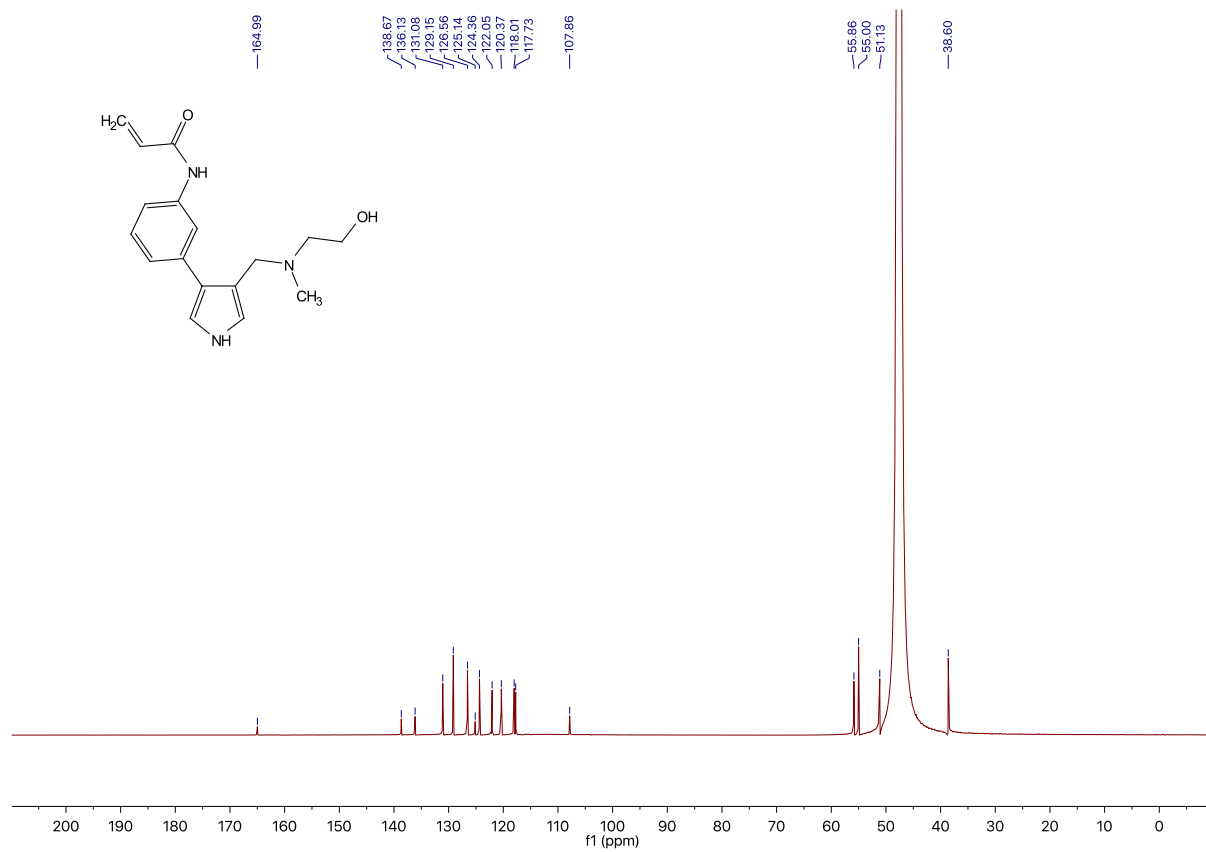

**Supplementary Figure 21.** <sup>13</sup>CNMR spectrum of compound 7.



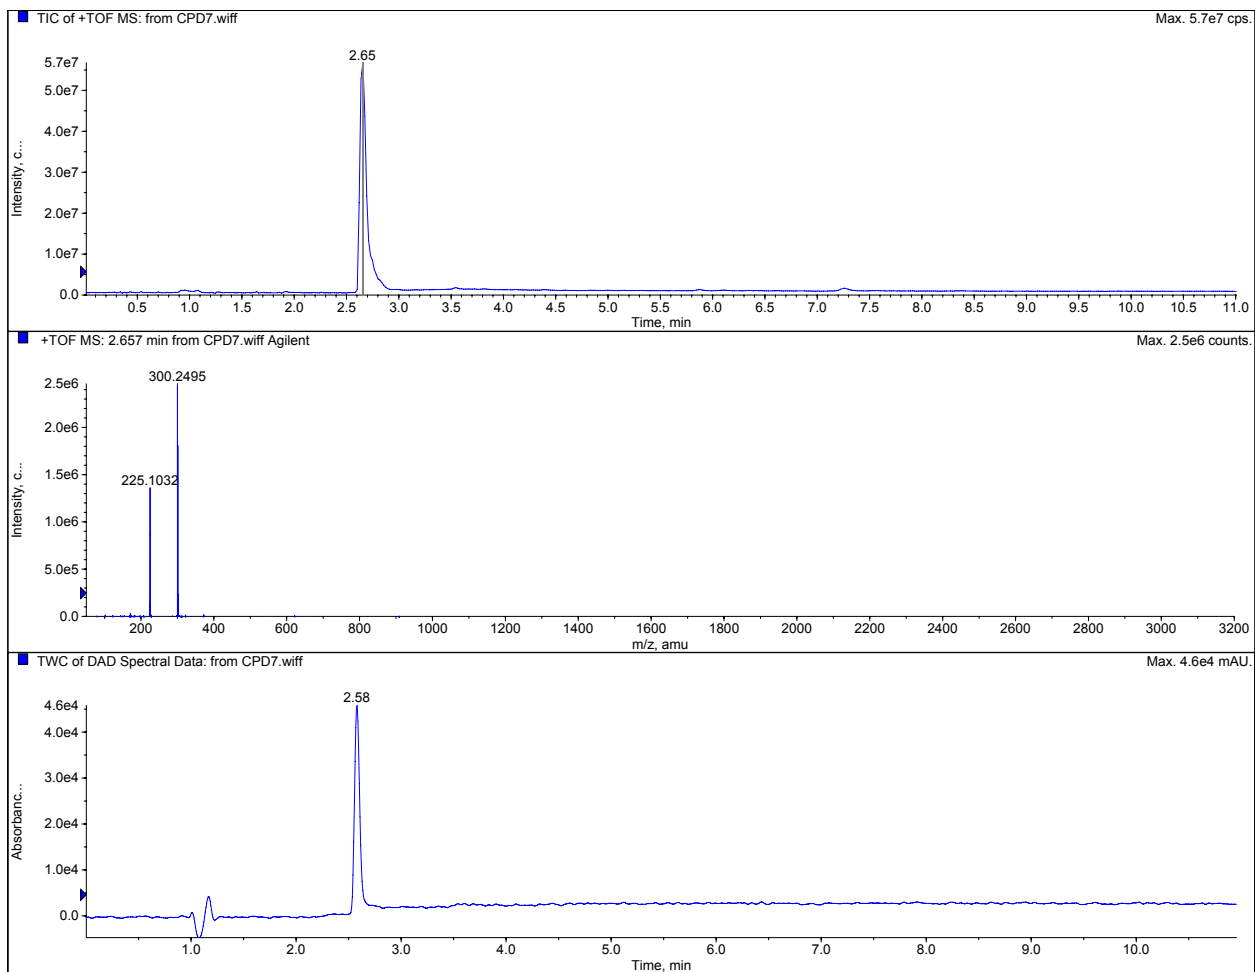

**Supplementary Figure S22.** HPLC-HRMS spectrum of compound 7.
